# Supplementary material for: Assessing the nutrient intake of a low-carbohydrate, high-fat (LCHF) diet: a hypothetical case study design
Source: PubMed Central journal article supplement — BMJ Open. 2018 Feb 8;8(2):e018846. doi: 10.1136/bmjopen-2017-018846 (PMC5829852; doi:10.1136/bmjopen-2017-018846), 2018-02-08
Supplement: bmjopen-2017-018846.draft_revisions.pdf [file bmjopen-2017-018846.draft_revisions.pdf]

# BMJ Open

BMJ Open is committed to open peer review. As part of this commitment we make the peer review history of every article we publish publicly available.

When an article is published we post the peer reviewers' comments and the authors' responses online. We also post the versions of the paper that were used during peer review. These are the versions that the peer review comments apply to.

The versions of the paper that follow are the versions that were submitted during the peer review process. They are not the versions of record or the final published versions. They should not be cited or distributed as the published version of this manuscript.

BMJ Open is an open access journal and the full, final, typeset and author-corrected version of record of the manuscript is available on our site with no access controls, subscription charges or pay-per-view fees (<http://bmjopen.bmj.com>).

If you have any questions on BMJ Open's open peer review process please email [info.bmjopen@bmj.com](mailto:info.bmjopen@bmj.com)

# BMJ Open

## Meeting the nutrient reference values on a low carbohydrate, high fat (LCHF) diet.

|                                 |                                                                                                                                                                                     |
|---------------------------------|-------------------------------------------------------------------------------------------------------------------------------------------------------------------------------------|
| Journal:                        | <i>BMJ Open</i>                                                                                                                                                                     |
| Manuscript ID                   | bmjopen-2017-018846                                                                                                                                                                 |
| Article Type:                   | Research                                                                                                                                                                            |
| Date Submitted by the Author:   | 27-Jul-2017                                                                                                                                                                         |
| Complete List of Authors:       | Zinn, Caryn; Auckland University of Technology, Sport & Recreation<br>Rush, Amy; Telethon Type 1 Diabetes Family Centre<br>Johnson, Rebecca; Telethon Type 1 Diabetes Family Centre |
| <b>Primary Subject Heading</b>: | Nutrition and metabolism                                                                                                                                                            |
| Secondary Subject Heading:      | Evidence based practice                                                                                                                                                             |
| Keywords:                       | Low-carbohydrate, high-fat, LCHF, Nutrient reference values, NRVs                                                                                                                   |
|                                 |                                                                                                                                                                                     |

SCHOLARONE™  
Manuscripts

Peer Review Only

1  
2  
3 **Meeting the nutrient reference values on a low carbohydrate, high fat (LCHF) diet.**  
4  
5  
6  
7

8 **Authors**  
9

10  
11 Caryn Zinn, Amy Rush, Rebecca Johnson.  
12  
13

14  
15  
16  
17 **Corresponding author**  
18

19  
20 Dr Caryn Zinn. AUT; Human Potential Centre. Faculty of Health & Environmental Sciences.  
21  
22 Private Bag 92006, Auckland 1142, New Zealand. PH: +64 9 921 9999 ext. 7842. Fax: +64 9  
23  
24 921 9960. Email: [caryn.zinn@aut.ac.nz](mailto:caryn.zinn@aut.ac.nz)  
25  
26

27 **Co-authors**  
28

29  
30 Amy Rush. Telethon Type 1 Diabetes Family Centre. 11 Limosa Close, Stirling Western  
31  
32 Australia 6021. Email: [amy@telethontype1.org.au](mailto:amy@telethontype1.org.au)  
33  
34

35  
36 Rebecca Johnson. Telethon Type 1 Diabetes Family Centre. 11 Limosa Close, Stirling  
37  
38 Western Australia 6021. Email: [rebecca@telethontype1.org.au](mailto:rebecca@telethontype1.org.au)  
39

40 **Keywords**  
41

42  
43 Low-carbohydrate, high-fat; LCHF; Nutrient reference values; NRVs  
44  
45

46 **Word count**  
47

48  
49 2626  
50  
51  
52  
53  
54  
55  
56  
57  
58  
59  
60

## Abstract

### Objective

The low-carbohydrate, high-fat (LCHF) diet is becoming increasingly employed in clinical dietetic practice as a means to manage a variety of health-related conditions. Yet, it continues to remain contentious in nutrition circles due to a belief that the diet is devoid of nutrients, and concern around its saturated fat content. This work aimed to assess the micronutrient intake of the LCHF diet under two conditions of saturated fat thresholds.

### Design

In this descriptive study, two LCHF meal plans were designed for each of two hypothetical cases representing the average Australian male and female weight-stable adult. National documented heights, a BMI of 22.5 to establish weight, and a 1.6 activity factor was used to estimate total energy intake using the Schofield equation. Carbohydrate was limited to <130g; protein set at 15-25% of total energy; fat supplied the remaining calories. One version of the diet aligned with the national saturated fat guideline threshold of <10% of total energy and the other included saturated fat ad libitum.

### Primary outcomes

The primary outcomes included all micronutrients, which were assessed using FoodWorks dietary analysis software against national Australian / New Zealand nutrient reference value (NRV) thresholds.

### Results

All of the meal plans exceeded the minimum NRV thresholds, apart from iron in the female meal plans. Saturated fat intake was unable to be reduced below the 10% threshold for the male plan.

## Conclusion

Despite macronutrient proportions not aligning with current national dietary guidelines, a well-planned LCHF meal plan can be considered micronutrient-replete. This is an important finding for health professionals, consumers and critics of LCHF nutrition, as it dispels the myth that these diets are suboptimal in their micronutrient supply. As with any diet, for optimal nutrient achievement, meals need to be well formulated.

## Strengths and limitations of this study

- A strength of this study is that we used an accurate, professional and local food composition database for dietary analysis.
- A strength of this study is that specialty foods, fortified foods and generally unpopular tasting food (i.e., liver and mussels) were specifically excluded from the food selection to avoid bias towards nutrient-density.
- A limitation of the study is that these results are specific to the two case studies selected, and inference to population groups cannot be made.

## Introduction

The low-carbohydrate, high-fat (LCHF) diet is becoming increasingly employed in clinical practice as a dietary means to achieve a variety of health goals, from weight reduction to management of chronic disease, in particular diabetes<sup>1-3</sup>. This style of eating has been shown to be efficacious both short and long term for its beneficial outcomes on metabolic health<sup>4-8</sup>. However, LCHF continues to remain a highly contentious topic in nutrition circles. Two likely reasons for this are i. the supposition that LCHF diets are devoid of certain nutrients, and therefore increase risk of nutrient deficiencies<sup>9 10</sup> and ii. concern around the

1  
2  
3 saturated fat content of the diets and the speculation that high intakes might increase risk of  
4 cardiovascular disease. Full-fat versions of animal fat-containing whole foods are not  
5 purposefully minimised in an LCHF diet; as a result, the saturated fat intake can exceed the  
6 maximum 10% of total energy intake threshold set by the National Australian and New  
7 Zealand Nutrient Reference Values (NRV) guidelines<sup>11</sup>. Recently, the science supporting the  
8 long-standing diet-heart hypothesis and the 10% threshold for saturated fat intake has been  
9 challenged; both epidemiological studies and randomised controlled trials have come under  
10 criticism for being flawed in research methodology and outcome interpretation<sup>12 13</sup>. This is  
11 an ongoing debate that indicates this area of public health and nutrition guidance needs  
12 further work to resolve<sup>12 14 15</sup>.

13  
14  
15  
16  
17  
18  
19  
20  
21  
22  
23  
24  
25  
26 The LCHF nutrition paradigm tend not to exclude any food groups specifically, but rather  
27 focuses on reducing intake from high load-carbohydrate foods in general; and when  
28 carbohydrate is eaten, whole-food sources are preferred to processed ones. In contrast,  
29 vegetarian and vegan diets are styles of eating that do exclude several food groups that  
30 contain vital micronutrients. Recently a lacto-ovo vegetarian diet has been shown to be  
31 nutrient-replete, if well-planned using an array of non-animal sources containing these  
32 potentially missing nutrients<sup>16</sup>. However, a traditional vegan diet is deficient in Vitamin B12,  
33 as this vitamin is derived only from foods of animal origin; it is also low in the fat-soluble  
34 vitamins A and D, with consumption of fortified foods and supplementation necessary for  
35 their repletion<sup>17 18</sup>. Despite the known nutrient deficiency risks that arise with vegan and  
36 some vegetarian eating styles, national and international nutrition organisations are not  
37 dissuasive of these diets; nutrition professionals merely address any dietary issues in clinical  
38 practice<sup>19 20</sup>. By contrast, carbohydrate-restricted diets are still frowned upon by many  
39 dietitians and associated national organisations<sup>10</sup>, despite their endorsement by some  
40 organisations such as The Commonwealth Scientific and Industrial Research Organisation  
41  
42  
43  
44  
45  
46  
47  
48  
49  
50  
51  
52  
53  
54  
55  
56  
57  
58  
59  
60

1  
2  
3 (CSIRO)<sup>21</sup>. This study aimed to assess the micronutrient thresholds of two versions of the  
4 LCHF diet against national NRV thresholds, as set by the Australian National Health and  
5 Medical Research Council (NHMRC) and New Zealand Ministry of Health (MOH)<sup>11</sup> under  
6 two conditions of saturated fat thresholds.  
7  
8  
9  
10

## 11 **Methods**

12  
13  
14  
15 In this descriptive study, we designed two LCHF meal plans for each of two hypothetical  
16 case studies representing the average Australian male and female as closely as possible.  
17  
18 Using the BMI equation  $BMI = (\text{weight-kg}) / (\text{height-m} \times \text{height-m})$ , we inputted actual  
19 heights recorded by the Australian Bureau of Statistics 2011-2013<sup>22</sup> and used the midpoint  
20 for a healthy range BMI of 22.5 to calculate body weight. To estimate total energy  
21 expenditure, we used the Schofield equation<sup>23</sup>, where weight and height variables and an  
22 activity factor of 1.6 (light level) were inputted. The adult age range of 19-50 years was  
23 selected from the Australian NHMRC and New Zealand MOH set of categories<sup>11</sup>. We used  
24 computer analysis software FoodWorks Professional, version 8 (Xyris software), which  
25 utilises an Australian and New Zealand food database. The only micronutrient NRV that  
26 varies within this age category (i.e., 19-35 years and 35-50 years) is magnesium; this was  
27 accounted for in the analysis. Total energy intake would likely change within the age groups  
28 and was accounted for in the analysis by ensuring that energy intake was met within 95% of  
29 requirements for both a 25-year old and a 45-year old male and female. We assumed weight  
30 stability and matched the energy intake with the calculated energy expenditure.  
31  
32  
33  
34  
35  
36  
37  
38  
39  
40  
41  
42  
43  
44  
45  
46  
47  
48

49 For the macronutrient thresholds, we selected a value of carbohydrate that aligned with the  
50 'low carbohydrate' definition as per Feinman and colleagues<sup>24</sup> i.e., <130g per day (or <26%  
51 of total energy). The protein threshold was calculated based on the upper limit of the  
52 acceptable macronutrient distribution range (AMDR) as per the Australian NHMRC and New  
53  
54  
55  
56  
57  
58  
59  
60

1  
2  
3 Zealand MOH guidelines (i.e., 25% of total energy intake)<sup>11</sup>. Fat was set as the remaining  
4  
5 calories. The two sample meal plans differed only by saturated fat content, which was set at  
6  
7 the threshold of 10% or less of total energy intake. All micronutrients were required to  
8  
9 achieve at least 100% of the NRVs; where the recommended daily intake (RDI) value was  
10  
11 not available, the adequate intakes (AI) value was used. Table 1 presents the demographic  
12  
13 data used for the case studies.  
14

15  
16  
17 Insert Table 1 here.  
18

19  
20 We created two different meal plans for the purpose of ensuring variety in food options, using  
21  
22 the same macronutrient and micronutrient thresholds and targets for both set of plans. For  
23  
24 each sample meal plan, the male and female versions differ only by portion sizes to align  
25  
26 with personalised energy requirements. For the dual purpose of preventing duplication in  
27  
28 Table 2 and wanting to illustrate dietary variety, we have elected to present meal plan sample  
29  
30 1 for females and meal plan sample 2 for males, along with their corresponding diets with  
31  
32 saturated fat limits. All meals have been developed with a whole-food principle (i.e., using  
33  
34 foods that have been minimally processed) as a foundation. We also opted to include foods  
35  
36 that we considered to be, generally, popular and acceptable, rather than any specialty or  
37  
38 unusual food that would demand an acquired taste.  
39  
40  
41

## 42 **Results**

43  
44  
45 Tables 2 and 3 present the LCHF sample meal plans for females and males, and the nutrient  
46  
47 analysis of the meal plans, respectively, with their corresponding plans aligning with the  
48  
49 saturated fat threshold of <10% total energy.  
50

51  
52  
53 Insert Table 2 here.  
54

55  
56 Insert Table 3 here.  
57  
58  
59  
60



1  
2  
3 Both of the meal plans successfully exceeded the NRV thresholds for all nutrients, apart from  
4  
5 two instances. The first was iron intake in females, the two meal plans achieving 86-98% of  
6  
7 the RDI threshold value for this mineral. The second instance was an inability to meet the  
8  
9 <10% of total energy intake saturated fat threshold in the male (meal plan 2 only). In this  
10  
11 plan, saturated fat amounted to 10.6% of total energy, exceeding the threshold by 0.6% (or  
12  
13 2g).

## 14 15 16 17 **Discussion**

18  
19 Overall, the LCHF meal plans successfully achieved almost all of the micronutrient RDI / AI  
20  
21 thresholds. There are several important points about iron that warrant discussion. Firstly, in  
22  
23 our meal plan development, we specifically selected whole, unprocessed foods that were not  
24  
25 fortified with nutrients, such as iron. We also decided to purposely exclude liver and mussels  
26  
27 from these plans, despite their rich nutrient density, as we are aware that these foods may not  
28  
29 be considered appealing for the majority of the population. However, it is worthwhile noting  
30  
31 that the addition of a small amount of chicken liver (i.e., 5g and 25g, or 1-4 mussels, in meal  
32  
33 plans 1 and 2, respectively), would have resulted in the RDI being met for iron. Our strategy  
34  
35 differs somewhat to the work of Reid et al., who, knowing iron is a nutrient of concern for  
36  
37 vegetarians, intentionally incorporated iron-fortified foods in their vegetarian meal plans.  
38  
39 Hence, they were able to meet iron requirements, apart from during pregnancy, where the  
40  
41 RDI is higher <sup>16</sup>.

42  
43  
44  
45  
46  
47 Secondly, iron bioavailability is affected by dietary composition and iron status, two aspects  
48  
49 that are not considered comprehensively in RDI threshold generation. For industrialised  
50  
51 countries, like Australia and New Zealand a mean iron bioavailability factor is used to  
52  
53 generate the iron RDI for all population groups, irrespective of dietary composition <sup>25</sup>. Iron  
54  
55 bioavailability is reduced by phytates, found predominantly in wholegrains, such as breads  
56  
57  
58  
59  
60

1  
2  
3 and cereals<sup>25</sup>. Other compounds that reduce bioavailability are polyphenols and oxalates, and  
4 while found in vegetables and fruit, are also present in wholegrains. The LCHF diet is  
5 typically very low (or devoid) in grains, which could mean higher iron bioavailability for  
6 those consuming such a diet. This, along with other factors that influence nutrient status, plus  
7 the natural variation in food intake raises caution about the use of the RDI threshold alone to  
8 assess an individual's diet at a glimpse. While not presented in this work, our nutrient  
9 analyses work on isocaloric diets aligning with the Australian NHMRC and New Zealand  
10 MOH guidelines, also indicate a failure to meet the RDI threshold for iron. As such, while the  
11 LCHF diet is often targeted for being inadequate, using NRVs as a dietary adequacy tool, one  
12 can assume a similar inadequacy for iron under mainstream dietary guidance using  
13 unfortified foods, where possible.  
14  
15  
16  
17  
18  
19  
20  
21  
22  
23  
24  
25  
26  
27

28 In the instance where the saturated fat threshold of <10% of total energy a threshold was not  
29 met in one of the male meal plans, comprehensive dietary manipulation of this meal plan for  
30 the specific purpose of meeting this target was attempted. In order to achieve carbohydrate  
31 and protein targets, the only way to achieve the energy requirements with a <10% saturated  
32 fat threshold was to add an alcoholic beverage into the meal plan, as it is the only food item  
33 that provides energy without any other macronutrient. We viewed this as being somewhat  
34 futile so decided against this option. It is also important to note that during this dietary  
35 manipulation exercise, in order to reduce the saturated fat contribution, once all the relevant  
36 animal foods were altered to low fat or non-fat versions (i.e., dairy products and meats) and  
37 coconut products were removed, the saturated fat content still slightly exceeded the 10%  
38 threshold, by 0.6%. It was only when we reduced the amount of avocados, certain seeds,  
39 olive oil and macadamia nuts, i.e., foods that contain predominantly unsaturated fats, did the  
40 thresholds align. Saturated fat guidelines exist in the form of a percentage of total energy  
41 threshold, and it is not known whether the public health caution for saturated fat relates to an  
42  
43  
44  
45  
46  
47  
48  
49  
50  
51  
52  
53  
54  
55  
56  
57  
58  
59  
60

1  
2  
3 amount consumed in grams or is relative to total energy only, suggesting that as a guideline it  
4  
5 is rather arbitrary.  
6

7  
8 There are three other nutrient components that warrant discussion in the context of LCHF  
9  
10 diets: B vitamins and fibre, protein and essential fatty acids.  
11

### 12 13 *B vitamins and fibre*

14  
15 The LCHF diet is frequently criticised for being deficient in B vitamins in particular Vitamin  
16  
17 B1, or thiamin, and fibre, two key components of grain-based foods. We have demonstrated  
18  
19 that these meal plans do indeed meet the RDI threshold for thiamin due to the incorporation  
20  
21 of alternative, every day thiamin-rich foods such as animal protein, nuts and seeds, and  
22  
23 several green vegetables. Despite RDIs met achieved for thiamin, one could call into question  
24  
25 the minimum threshold of thiamin required in an LCHF context. A key function of thiamin is  
26  
27 the metabolism of carbohydrate <sup>26</sup>; it could be speculated that with a reduced intake of  
28  
29 carbohydrate, less thiamin is required. However, considering that in the absence of  
30  
31 exogenous carbohydrate, glucose is still made internally through gluconeogenic precursors,  
32  
33 research is warranted to determine whether this theory holds any truth. We also demonstrate  
34  
35 that the AIs for fibre are surpassed in all of these meal plans, and while devoid of  
36  
37 wholegrains, fibre, both soluble and insoluble, can be easily derived from vegetables, some  
38  
39 fruit, nuts and seeds.  
40  
41  
42  
43  
44

### 45 46 *Protein*

47  
48 Another misconception about the LCHF diet is that it is excessive in protein. We used the  
49  
50 protein AMDR as per the Australian NHMRC and New Zealand MOH in the development of  
51  
52 these meal plans; however, the female meal plan 1 (<10% saturated fat threshold) exceeded  
53  
54 the maximum AMDR protein threshold by 2% (or 7g of protein). In the dietary manipulation  
55  
56 required to reduce saturated fat (i.e., a swap from untrimmed Sirloin steak to lean Eye fillet  
57  
58  
59  
60

1  
2  
3 steak for dinner, and a swap from full-fat to non-fat dairy products) what resulted was a  
4  
5 higher proportion of protein being derived from those foods at the same quantities so it was  
6  
7 unavoidable. While the LCHF diet is not intended to be high in protein, by nature of the  
8  
9 foods types consumed to replace carbohydrates, it can end up slightly exceeding the AMDR  
10  
11 threshold.  
12

### 13 14 *Omega-6: omega-3 Polyunsaturated Fat (PUFA) ratio*

15  
16  
17 A key characteristic of the LCHF way of eating is the discouragement of consumption of  
18  
19 seed oils (eg. Canola, Sunflower, Soybean and Rice Bran oil), in order to minimise intake of  
20  
21 linoleic acid (omega-6 PUFA), and consequently, to achieve an optimal omega 6:3 ratio.  
22  
23 Evidence suggests that a high ratio is pro-inflammatory and has a role to play in promoting  
24  
25 the pathogenesis of chronic diseases such as cardiovascular disease, cancer, inflammatory  
26  
27 and autoimmune diseases <sup>27 28</sup>. Furthermore, data indicates that humans evolved on a diet  
28  
29 with a 1:1 omega 6:3 ratio, whereas Western dietary patterns typically reflect a ratio of  
30  
31 around 15-20:1 <sup>28</sup>. Along with the promotion of olive oil use, which is unanimously endorsed,  
32  
33 NHMRC / MOH guidelines recommend the use and consumption of vegetable fats (i.e.,  
34  
35 margarine, Canola, Sunflower, Soybean and Rice Bran oil) in place of fats with a  
36  
37 predominantly saturated fat make-up (i.e., butter, coconut oil). As a result, most packaged  
38  
39 supermarket foods including foods recommended by the NHMRC / MOH, such as liquid  
40  
41 breakfasts, wholegrain bread, and cereals, contain high omega-6 seed oils. This would not  
42  
43 necessarily be problematic if omega-3 intakes were increasing on a population level.  
44  
45 However, this is not the case; it was recently reported in the Australian 2011–2012 National  
46  
47 Nutrition and Physical Activity Survey that 80% of the population was not meeting the NRV  
48  
49 threshold for omega-3 <sup>29</sup>. In our sample meal plans, we demonstrate favourable omega-6:  
50  
51 omega-3 ratios, i.e., less than the 10:1 NRV thresholds, and substantially closer to that of our  
52  
53 dietary composition prior to the agricultural revolution.  
54  
55  
56  
57  
58  
59  
60

## Conclusion

There were two key limitations to this work. Firstly, the average height for Australian males and females, respectively, and the midpoint BMI values were used to extrapolate the weights of the two hypothetical case studies. These weights do not align with documented weights for Australian males (85.9kg) and females (71.1kg), respectively <sup>22</sup>. This underestimation of weight would have underestimated energy intake to a small extent. Secondly, our analyses were limited to the available values in the FoodWorks database; consequently, an accurate estimate of Vitamin D intake was not available. It is reported that due to current eating patterns, it is almost impossible to get sufficient Vitamin D (in this case 5µg/day) from the diet alone <sup>30</sup> and it is the assumption that it will be derived from sun exposure. It is likely that the LCHF diet supplies more Vitamin D than mainstream nutrition guidelines due to its greater intake of high fat, Vitamin D-rich foods, such as full-fat dairy, butter, eggs and fatty fish.

We have demonstrated that a well-formulated LCHF diet can provide sufficient intakes of all of the micronutrients profiled in the FoodWorks database, apart from iron for females. This marginal shortfall along with the acknowledged limitations of using NRVs in estimating dietary adequacy, leads us to believe that this is not a nutrient of concern for those consuming the LCHF diet. Irrespective of the ongoing saturated fat / heart disease scientific debate, it is still possible to adopt the LCHF diet while keeping saturated fat intake around the 10% of total energy threshold. Considering this way of eating provides a replete set of nutrients, and has been shown to be effective for improving metabolic health, particularly for people with diabetes, it should at least be considered a suitable dietary option for populations, alongside that of mainstream MOH guidelines.

### Contributor ship statement

All authors contributed to the conception and design of the research; C. Zinn, A. Rush contributed to the diet development and analysis. All authors contributed to the interpretation of the data; C. Zinn drafted the manuscript. All authors read and approved the final manuscript.

### Competing interests

All authors have completed the ICMJE uniform disclosure form at [www.icmje.org/coi\\_disclosure.pdf](http://www.icmje.org/coi_disclosure.pdf) and declare: no support from any organisation for the submitted work; no financial relationships with any organisations that might have an interest in the submitted work in the previous three years; CZ has co-authored two books called “What The Fat? - Fat’s in, Sugar’s out”, and “What The Fat – Sports performance” which both assume an LCHF nutrition paradigm.

### Funding

This research received no specific grant from any funding agency in the public, commercial or not-for-profit sectors.

### Data sharing statement

Data (nutrient analysis) is unable to be placed on a data sharing system due to it being embedded in specific nutrient analysis software that is unable to be shared outside of the software programme. However, a print screen version of the data is available upon request from the author.

### References

- 1  
2  
3 1. Unwin D, Unwin J. Low carbohydrate diet to achieve weight loss and improve  
4 HbA1c in type 2 diabetes and pre-diabetes: experience from one general practice.  
5  
6 *Practical Diabetes* 2014;31(2):76-79. doi: 10.1002/pdi.1835  
7  
8
- 9  
10 2. Noakes TD. Low-carbohydrate and high-fat intake can manage obesity and associated  
11 conditions: Occasional survey. *S. Afr. Med. J.* 2013;103(11):826-30. doi:  
12  
13 10.7196/SAMJ.7302  
14
- 15  
16 3. McKenzie A, Hallberg SJ, Creighton BC, et al. A Novel Intervention Including  
17 Individualized Nutritional Recommendations Reduces Hemoglobin A1c Level,  
18 Medication Use, and Weight in Type 2 Diabetes. *JMIR Diabetes* 2017;2(1):e5. doi:  
19  
20 10.2196/diabetes.6981  
21  
22
- 23  
24 4. Fan Y, Di H, Chen G, et al. Effects of low carbohydrate diets in individuals with type  
25  
26 2 diabetes: systematic review and meta-analysis. *Int. J. Clin. Exp. Med.*  
27  
28 2016;9(6):11166-74.  
29  
30
- 31  
32 5. Forsythe CE, Phinney SD, Fernandez ML, et al. Comparison of low fat and low  
33 carbohydrate diets on circulating fatty acid composition and markers of inflammation.  
34  
35 *Lipids* 2008;43(1):65-77. doi: 10.1007/s11745-007-3132-7  
36  
37
- 38  
39 6. Sackner-Bernstein J, Kanter D, Kaul S. Dietary Intervention for Overweight and  
40 Obese Adults: Comparison of Low-Carbohydrate and Low-Fat Diets. A Meta-  
41  
42 Analysis. *PLoS One* 2015;10(10):e0139817. doi: 10.1371/journal.pone.0139817  
43  
44
- 45  
46 7. Foster GD, Wyatt HR, Hill JO, et al. Weight and metabolic outcomes after 2 years on  
47 a low-carbohydrate versus low-fat diet: a randomized trial. *Ann. Intern. Med.*  
48  
49 2010;153(3):147-57. doi: 10.7326/0003-4819-153-3-201008030-00005  
50  
51
- 52  
53 8. Shai I, Schwarzfuchs D, Henkin Y, et al. Weight loss with a low-carbohydrate,  
54 Mediterranean, or low-fat diet. *N. Engl. J. Med.* 2008;359(3):229-41. doi:  
55  
56 10.1056/NEJMoa0708681  
57  
58  
59  
60

- 1  
2  
3 9. Diabetes UK. Is it time to stop promoting carbohydrates to people with diabetes?  
4  
5 2017 [cited 2017 8 March]. Available from:  
6  
7 [https://www.diabetes.org.uk/About\\_us/News/Carbohydrates-and-diabetes-debate/](https://www.diabetes.org.uk/About_us/News/Carbohydrates-and-diabetes-debate/)  
8  
9 accessed 15 September 2015.  
10
- 11  
12 10. Nursing Review. Fad diets: what do dietitians say about the latest crop? 2015  
13  
14 [Available from: [http://www.nursingreview.co.nz/issue/june-2015-vol-15-3/fad-diets-](http://www.nursingreview.co.nz/issue/june-2015-vol-15-3/fad-diets-what-do-dietitians-say-about-the-latest-crop/#.WL8yITXJKnk)  
15  
16 [what-do-dietitians-say-about-the-latest-crop/#.WL8yITXJKnk](http://www.nursingreview.co.nz/issue/june-2015-vol-15-3/fad-diets-what-do-dietitians-say-about-the-latest-crop/#.WL8yITXJKnk) accessed 5 June 2015.  
17
- 18  
19 11. National Health and Medical Research Council, Ministry of Health. Nutrient  
20  
21 reference values for Australia and New Zealand Including Recommended Dietary  
22  
23 Intakes., 2005.  
24
- 25  
26 12. Harcombe Z, Baker JS, Davies B. Evidence from prospective cohort studies does not  
27  
28 support current dietary fat guidelines: a systematic review and meta-analysis. *British*  
29  
30 *J. Sports Med.* 2016;0:1-8. doi: 10.1136/bjsports-2016-096550  
31
- 32  
33 13. Harcombe Z, Baker JS, DiNicolantonio JJ, et al. Evidence from randomised  
34  
35 controlled trials does not support current dietary fat guidelines: a systematic review  
36  
37 and meta-analysis. *Open Heart* 2016;3(2):e000409. doi: 10.1136/openhrt-2016-  
38  
39 000409  
40
- 41  
42 14. Ramsden CE, Zamora D, Majchrzak-Hong S, et al. Re-evaluation of the traditional  
43  
44 diet-heart hypothesis: analysis of recovered data from Minnesota Coronary  
45  
46 Experiment (1968-73). *BMJ* 2016;353:i1246. doi: 10.1136/bmj.i1246  
47
- 48  
49 15. Siri-Tarino PW, Chiu S, Bergeron N, et al. Saturated Fats Versus Polyunsaturated  
50  
51 Fats Versus Carbohydrates for Cardiovascular Disease Prevention and Treatment.  
52  
53 *Annu. Rev. Nutr.* 2015;35:517-43. doi: 10.1146/annurev-nutr-071714-034449  
54
- 55  
56 16. Reid MA, Marsh KA, Zeuschner CL, et al. Meeting the nutrient reference values on a  
57  
58 vegetarian diet. *Med. J. Aust.* 2013;199(4 Suppl):S33-40.  
59  
60



- 1  
2  
3 17. Pawlak R, Lester SE, Babatunde T. The prevalence of cobalamin deficiency among  
4 vegetarians assessed by serum vitamin B12: a review of literature. *Eur. J. Clin. Nutr.*  
5 2014;68(5):541-8. doi: 10.1038/ejcn.2014.46  
6  
7  
8  
9  
10 18. Craig WJ. Nutrition concerns and health effects of vegetarian diets. *Nutr. Clin. Pract.*  
11 2010;25(6):613-20. doi: 10.1177/0884533610385707  
12  
13  
14 19. American Dietetic Association, Dietitians of Canada. Position of the American  
15 Dietetic Association and Dietitians of Canada: Vegetarian diets. *J. Am. Diet. Assoc.*  
16 2003;103(6):748-65. doi: 10.1053/jada.2003.50142  
17  
18  
19  
20  
21 20. Webb D. Defending Vegan Diets — RDs Aim to Clear Up Common Misconceptions  
22 About Vegan Diets. *Today's Dietitian*. Spring City, PA: Great Valley Publishing  
23 Company, Inc., 2010:20.  
24  
25  
26  
27 21. CSIRO. CSIRO Low Carb Diet Book 2017 [cited 2017 18 April]. Available from:  
28 <https://www.csiro.au/en/Research/Health/CSIRO-diets/CSIRO-Low-Carb-Diet-Book>  
29 accessed 18 April 2017.  
30  
31  
32  
33  
34 22. Australian Bureau of Statistics. Profiles of Health, Australia, 2011-13 2013 [cited  
35 2017 3 February]. Available from:  
36 <http://www.abs.gov.au/ausstats/abs@.nsf/Lookup/4338.0main+features212011-13>  
37 accessed 3 February 2017.  
38  
39  
40  
41  
42  
43 23. Schofield WN. Predicting basal metabolic rate, new standards and review of previous  
44 work. *Hum. Nutr. Clin. Nutr.* 1985;39 Suppl 1:5-41.  
45  
46  
47 24. Feinman RD, Pogozelski WK, Astrup A, et al. Dietary carbohydrate restriction as the  
48 first approach in diabetes management: critical review and evidence base. *Nutrition*  
49 2015;31(1):1-13. doi: 10.1016/j.nut.2014.06.011  
50  
51  
52  
53  
54 25. Hurrell R, Egli I. Iron bioavailability and dietary reference values. *Am. J. Clin. Nutr.*  
55 2010;91(5):1461S-67S. doi: 10.3945/ajcn.2010.28674F  
56  
57  
58  
59  
60

- 1  
2  
3 26. Manzetti S, Zhang J, van der Spoel D. Thiamin function, metabolism, uptake, and  
4 transport. *Biochemistry* 2014;53(5):821-35. doi: 10.1021/bi401618y  
5  
6  
7 27. Kang JX. The omega-6/omega-3 fatty acid ratio in chronic diseases: animal models  
8 and molecular aspects. *World Rev. Nutr. Diet.* 2011;102:22-9. doi:  
9 10.1159/000327787  
10  
11  
12  
13 28. Simopoulos AP. The importance of the omega-6/omega-3 fatty acid ratio in  
14 cardiovascular disease and other chronic diseases. *Exp. Biol. Med. (Maywood)*  
15 2008;233(6):674-88. doi: 10.3181/0711-MR-311  
16  
17  
18  
19 29. Meyer BJ. Australians are not Meeting the Recommended Intakes for Omega-3 Long  
20 Chain Polyunsaturated Fatty Acids: Results of an Analysis from the 2011-2012  
21 National Nutrition and Physical Activity Survey. *Nutrients* 2016;8(3):111. doi:  
22 10.3390/nu8030111  
23  
24  
25  
26  
27  
28  
29 30. Fuller KE, Casparian JM. Vitamin D: balancing cutaneous and systemic  
30 considerations. *South Med. J.* 2001;94(1):58-64.  
31  
32  
33  
34  
35  
36  
37  
38  
39  
40  
41  
42  
43  
44  
45  
46  
47  
48  
49  
50  
51  
52  
53  
54  
55  
56  
57  
58  
59  
60

Table 1: Case study demographics.

|                | Age range (years) | Reference Height (cm) | Reference Weight (kg) | PAL | Energy (kCal) | CHO (g) | Protein UL 25% E (g) | Saturated Fat 10% E (g) |
|----------------|-------------------|-----------------------|-----------------------|-----|---------------|---------|----------------------|-------------------------|
| <b>Male</b>    | 19-50             | 175                   | 63-71                 | 1.6 | 2820          | 65      | 165.4                | 30.5                    |
| <b>Females</b> | 19-50             | 162                   | 56.3                  | 1.6 | 2203          | 65      | 129.4                | 23.8                    |

For peer review only

Table 2: LCHF sample meal plans.

| LCHF meal plan 1 (females)                                                                                                                                                                   | LCHF meal plan 1 (females) (saturated fat <10% of total energy)                                                                                                                                              | LCHF meal plan 2 (males)                                                                                                                                                               | LCHF meal plan 2 (males) (saturated fat <10% of total energy)                                                                                                                                                                         |
|----------------------------------------------------------------------------------------------------------------------------------------------------------------------------------------------|--------------------------------------------------------------------------------------------------------------------------------------------------------------------------------------------------------------|----------------------------------------------------------------------------------------------------------------------------------------------------------------------------------------|---------------------------------------------------------------------------------------------------------------------------------------------------------------------------------------------------------------------------------------|
| <i>Breakfast</i>                                                                                                                                                                             | <i>Breakfast</i>                                                                                                                                                                                             | <i>Breakfast</i>                                                                                                                                                                       | <i>Breakfast</i>                                                                                                                                                                                                                      |
| ¼ cup frozen mixed berries, 150g plain, unsweetened, full-fat yoghurt, 2 T each sunflower and pumpkin seeds, 3 macadamia nuts, 2 Brazil nuts, 6 almonds                                      | ¼ cup frozen mixed berries, 150g plain, <i>unsweetened low-fat yoghurt</i> , 2 T each sunflower and pumpkin seeds, 3 macadamia nuts, 2 Brazil nuts, 6 almonds                                                | Omelette: 3 eggs, 60g mushrooms, 100g tomato, 1 cup baby spinach, cooked in 2 tsp butter. Coffee made with 200ml full-fat milk                                                         | Omelette: 3 eggs, 60g mushrooms, 100g tomato, 1 cup baby spinach, cooked in 3 <i>tsp olive oil</i> . Coffee made with 200ml <i>low-fat milk</i>                                                                                       |
| <i>Lunch</i>                                                                                                                                                                                 | <i>Lunch</i>                                                                                                                                                                                                 | <i>Lunch</i>                                                                                                                                                                           | <i>Lunch</i>                                                                                                                                                                                                                          |
| Tuna salad: 95g tin tuna, canned in brine (drained), 1 cup baby spinach leaves, 60g English cucumber, 5 cherry tomatoes, 30g cheddar cheese, 2T linseeds, 1 tsp basil pesto, 3 tsp olive oil | Tuna salad: 95g tin tuna, canned in brine (drained), 1 cup baby spinach leaves, 60g English cucumber, 5 cherry tomatoes, <i>30g low fat cottage cheese</i> , 2T linseeds, 10 green olives, 5 tsp avocado oil | Beef salad: 120g Eye fillet, 1 cup spinach leaves, ½ red capsicum, 60g English cucumber, 5 cherry tomatoes, ½ large avocado, 5 walnuts, 1T linseeds, 30g parmesan cheese, 2T olive oil | Beef salad: 150g Eye fillet, 1 cup spinach leaves, ½ red capsicum, 60g English cucumber, 5 cherry tomatoes, ½ large avocado, <i>3 T sunflower seeds, 12 green olives, 30g low fat cottage cheese, 2T olive oil, 2 tsp avocado oil</i> |
| <i>Dinner</i>                                                                                                                                                                                | <i>Dinner</i>                                                                                                                                                                                                | <i>Dinner</i>                                                                                                                                                                          | <i>Dinner</i>                                                                                                                                                                                                                         |
| 150g Sirloin steak, fat not trimmed, grilled, roasted vegetables: 8 florets cauliflower, 1 medium sized beetroot, 1 medium courgette, 1 medium carrot, coated in 2T olive oil                | <i>150g Beef eye fillet, grilled, roasted vegetables: 8 florets cauliflower, 1 medium sized beetroot, 1 medium courgette, 1 medium carrot, coated in 2T olive oil</i>                                        | 130g grilled Salmon, 100g green beans, 150g broccoli, 200g grilled pumpkin, ½ cup peas, 1 T olive oil                                                                                  | 150g grilled Salmon, 100g green beans, 150g broccoli, 200g grilled pumpkin, ½ cup peas, 1 T olive oil                                                                                                                                 |
| <i>Snacks</i>                                                                                                                                                                                | <i>Snacks</i>                                                                                                                                                                                                | <i>Snacks</i>                                                                                                                                                                          | <i>Snacks</i>                                                                                                                                                                                                                         |
| 10 medium strawberries<br>3T pistachio nuts<br>Coffee made with 200ml full fat milk                                                                                                          | 10 medium strawberries<br>3T pistachio nuts<br><i>100g low fat plain, unsweetened yoghurt</i><br>Coffee made with <i>200ml low-fat milk</i>                                                                  | 20 macadamia nuts<br>Smoothie made with 200ml full fat milk, 10 medium strawberries, crushed nuts (20g almonds, 2T linseeds)                                                           | 20 macadamia nuts<br>Smoothie made with <i>200ml low-fat milk</i> , 10 medium strawberries, crushed nuts (20g almonds, 2T linseeds, <i>100g low fat plain, unsweetened yoghurt</i> )                                                  |

Table 3: Nutrient analysis of LCHF meal plans.

| Nutrient                       | Female meal plans |                                                         |                  | Male meal plans |                                            |                  |
|--------------------------------|-------------------|---------------------------------------------------------|------------------|-----------------|--------------------------------------------|------------------|
|                                | Meal plan 1       | Meal plan 1<br>(saturated fat<br><10% TE)<br>NRV / goal | NRV / goal       | Meal plan 2     | Meal plan 2<br>(saturated fat<br><10% TE ) | NRV / goal       |
| Energy (Cal)                   | 2145              | 2053                                                    | 2203             | 2675            | 2758                                       | 2820             |
| Carbohydrate (g)               | 61                | 67                                                      | 248-358          | 66              | 69                                         | 303-439          |
| % TE <sup>†</sup>              | 11                | 13                                                      | 45-65            | 10              | 10                                         | 45-65            |
| Protein (g)                    | 115               | 135                                                     | 83-138           | 149             | 164                                        | 106-176          |
| % TE                           | 22                | 26                                                      | 15-25            | 22              | 24                                         | 15-25            |
| Fat (g)                        | 153               | 129                                                     | 49-86            | 194             | 195                                        | 63-110           |
| % TE                           | 63                | 57                                                      | 20-35            | 65              | 64                                         | 20-35            |
| Saturated fat (g)              | 40                | 21                                                      | 24               | 46              | 33                                         | 31               |
| % TE                           | 28                | 9.6                                                     | 10               | 15              | 10.6                                       | 10               |
| Trans fats (g)                 | 2.2               | 0.7                                                     | <2.4             | 1.4             | 0.8                                        | <3g              |
| % TE                           | 0.9               | 0.3                                                     | <1% <sup>‡</sup> | 0.4             | 0.3                                        | <1% <sup>‡</sup> |
| Monounsaturated fat (MUFA) (g) | 75                | 71                                                      | -                | 101             | 117                                        | -                |
| % total fat                    | 53                | 59                                                      | -                | 56              | 65                                         | -                |
| Polyunsaturated fat (PUFA) (g) | 27                | 28                                                      | -                | 32              | 31                                         | -                |
| % total fat                    | 19                | 23                                                      | -                | 18              | 17                                         | -                |
| Linoleic acid (O6 PUFA) (g)    | 20.4              | 18.6                                                    | 8*               | 19.1            | 18.5                                       | 13*              |
| α-linoleic acid (O3 PUFA) (g)  | 5.8               | 5.5                                                     | 0.8*             | 9.3             | 6.2                                        | 1.3*             |
| Omega 6: omega 3 ratio         | 3.5               | 3.4                                                     | 10               | 2.1             | 3.0                                        | 10               |
| Fibre (g)                      | 38                | 39                                                      | 25*              | 45              | 44                                         | 30*              |
| Thiamin (mg)                   | 1.4               | 1.4                                                     | 1.1              | 1.6             | 1.8                                        | 1.2              |
| Riboflavin (mg)                | 2.4               | 2.4                                                     | 1.1              | 3.3             | 3.5                                        | 1.3              |
| Niacin (mg)                    | 23.4              | 18.8                                                    | 14               | 16.2            | 17.5                                       | 16               |
| Vitamin C (mg)                 | 371               | 370                                                     | 45               | 394             | 398                                        | 45               |
| Vitamin A (µg)                 | 2247              | 2095                                                    | 700              | 2374            | 2047                                       | 900              |
| Vitamin E (mg)                 | 23                | 22                                                      | 7*               | 32              | 41                                         | 10*              |
| Vitamin B12 (µg)               | 3.9               | 6.4                                                     | 2.4              | 11.6            | 12.8                                       | 2.4              |
| Folate, total (µg)             | 568               | 583                                                     | 400              | 788             | 757                                        | 400              |
| Calcium (mg)                   | 1093              | 1224                                                    | 1000             | 1216            | 1251                                       | 1000             |
| Iron (mg)                      | 16                | 16                                                      | 18               | 20              | 21                                         | 8                |
| Magnesium (mg)                 | 553               | 589                                                     | 310              | 582             | 598                                        | 400              |
| Zinc (mg)                      | 16                | 22                                                      | 8                | 23              | 24                                         | 14               |

|                            |      |      |       |      |      |       |
|----------------------------|------|------|-------|------|------|-------|
| Sodium (mg)                | 2183 | 2250 | 460*  | 1554 | 2032 | 460*  |
| Potassium (mg)             | 4639 | 5154 | 2800* | 5585 | 6107 | 3800* |
| Phosphorous (mg)           | 1848 | 2076 | 1000  | 2478 | 2644 | 1000  |
| Selenium ( $\mu\text{g}$ ) | 166  | 169  | 60    | 113  | 117  | 70    |
| Iodine ( $\mu\text{g}$ )   | 225  | 190  | 150   | 223  | 207  | 150   |

† TE: Total energy

\*AIs were used as RDIs were unavailable

‡ World Health Organisation recommendation for trans fats

# BMJ Open

## Assessing the nutrient intake of a low carbohydrate, high fat (LCHF) diet; a hypothetical case study design.

|                                 |                                                                                                                                                                                                                        |
|---------------------------------|------------------------------------------------------------------------------------------------------------------------------------------------------------------------------------------------------------------------|
| Journal:                        | <i>BMJ Open</i>                                                                                                                                                                                                        |
| Manuscript ID                   | bmjopen-2017-018846.R1                                                                                                                                                                                                 |
| Article Type:                   | Research                                                                                                                                                                                                               |
| Date Submitted by the Author:   | 18-Dec-2017                                                                                                                                                                                                            |
| Complete List of Authors:       | Zinn, Caryn; Auckland University of Technology, School of Sport & Recreation. Human Potential Centre.<br>Rush, Amy; Telethon Type 1 Diabetes Family Centre<br>Johnson, Rebecca; Telethon Type 1 Diabetes Family Centre |
| <b>Primary Subject Heading</b>: | Nutrition and metabolism                                                                                                                                                                                               |
| Secondary Subject Heading:      | Evidence based practice                                                                                                                                                                                                |
| Keywords:                       | Low-carbohydrate, high-fat, LCHF, Nutrient reference values, NRVs                                                                                                                                                      |
|                                 |                                                                                                                                                                                                                        |

SCHOLARONE™  
Manuscripts

Peer Review Only

1  
2  
3 **Assessing the nutrient intake of a low carbohydrate, high fat (LCHF) diet; a**  
4 **hypothetical case study design.**  
5  
6  
7  
8  
9

10 **Authors**  
11

12  
13 Caryn Zinn, Amy Rush, Rebecca Johnson.  
14  
15

16  
17  
18  
19 **Corresponding author**  
20

21 Dr Caryn Zinn. AUT; Human Potential Centre. Faculty of Health & Environmental Sciences.  
22  
23 Private Bag 92006, Auckland 1142, New Zealand. PH: +64 9 921 9999 ext. 7842. Fax: +64 9  
24  
25 921 9960. Email: [caryn.zinn@aut.ac.nz](mailto:caryn.zinn@aut.ac.nz)  
26  
27

28  
29 **Co-authors**  
30

31 Amy Rush. Telethon Type 1 Diabetes Family Centre. 11 Limosa Close, Stirling Western  
32  
33 Australia 6021. Email: [amy@telethontype1.org.au](mailto:amy@telethontype1.org.au)  
34  
35

36 Rebecca Johnson. Telethon Type 1 Diabetes Family Centre. 11 Limosa Close, Stirling  
37  
38 Western Australia 6021. Email: [rebecca@telethontype1.org.au](mailto:rebecca@telethontype1.org.au)  
39  
40

41 **Keywords**  
42

43  
44 Low-carbohydrate, high-fat; LCHF; Nutrient reference values; NRVs  
45  
46

47 **Word count**  
48

49  
50 3075  
51  
52  
53  
54  
55  
56  
57  
58  
59  
60



## Abstract

### Objective

The low-carbohydrate, high-fat (LCHF) diet is becoming increasingly employed in clinical dietetic practice as a means to manage many health-related conditions. Yet, it continues to remain contentious in nutrition circles due to a belief that the diet is devoid of nutrients, and concern around its saturated fat content. This work aimed to assess the micronutrient intake of the LCHF diet under two conditions of saturated fat thresholds.

### Design

In this descriptive study, two LCHF meal plans were designed for two hypothetical cases representing the average Australian male and female weight-stable adult. National documented heights, a BMI of 22.5 to establish weight, and a 1.6 activity factor was used to estimate total energy intake using the Schofield equation. Carbohydrate was limited to <130g; protein set at 15-25% of total energy; fat supplied the remaining calories. One version of the diet aligned with the national saturated fat guideline threshold of <10% of total energy and the other included saturated fat ad libitum.

### Primary outcomes

The primary outcomes included all micronutrients, which were assessed using FoodWorks dietary analysis software against national Australian / New Zealand nutrient reference value (NRV) thresholds.

### Results

All of the meal plans exceeded the minimum NRV thresholds, apart from iron in the female meal plans, which achieved 86-98% of the threshold. Saturated fat intake was logistically

1  
2  
3 unable to be reduced below the 10% threshold for the male plan but exceeded the threshold  
4  
5 by 2g (0.6%).  
6

## 7 **Conclusion**

8  
9  
10 Despite macronutrient proportions not aligning with current national dietary guidelines, a  
11 well-planned LCHF meal plan can be considered micronutrient-replete. This is an important  
12 finding for health professionals, consumers and critics of LCHF nutrition, as it dispels the  
13 myth that these diets are suboptimal in their micronutrient supply. As with any diet, for  
14 optimal nutrient achievement, meals need to be well formulated.  
15  
16  
17  
18  
19  
20  
21  
22  
23  
24

## 25 **Strengths and limitations of this study**

- 26  
27  
28 - A strength of this study is that we used an accurate, professional and local food  
29 composition database for dietary analysis.  
30  
31  
32 - A strength of this study is that specialty foods, fortified foods and generally unpopular  
33 tasting food (i.e., liver and mussels) were specifically excluded from the food  
34 selection to avoid bias towards nutrient-density.  
35  
36  
37  
38 - A limitation of the study is that these results are specific to the two case studies  
39 selected, and inference to population groups cannot be made.  
40  
41  
42  
43  
44  
45  
46  
47  
48  
49  
50  
51  
52  
53  
54  
55  
56  
57  
58  
59  
60

## Introduction

The low-carbohydrate, high-fat (LCHF) diet is becoming increasingly employed in clinical practice as a dietary means to achieve a variety of health goals, from weight reduction to management of chronic disease, in particular diabetes<sup>1-3</sup>. This style of eating has been shown to be efficacious both short and long term for its beneficial outcomes on metabolic health<sup>4-8</sup>. However, LCHF continues to remain a highly contentious topic in nutrition circles. Two likely reasons for this are i. the supposition that LCHF diets are devoid of certain nutrients, and therefore increase risk of nutrient deficiencies<sup>9 10</sup> and ii. concern around the saturated fat content of the diets and the speculation that high intakes might increase risk of cardiovascular disease. Full-fat versions of animal fat-containing whole foods are not purposefully minimised in an LCHF diet; as a result, the saturated fat intake can exceed the maximum 10% of total energy intake threshold set by the National Australian and New Zealand Nutrient Reference Values (NRV) guidelines<sup>11</sup>. Recently, the science supporting the long-standing diet-heart hypothesis and the 10% threshold for saturated fat intake has been challenged; both epidemiological studies and randomised controlled trials have come under criticism for being flawed in research methodology and outcome interpretation<sup>12 13</sup>. This is an ongoing debate that indicates this area of public health and nutrition guidance needs further work to resolve<sup>12 14 15</sup>.

The LCHF nutrition approach tends not to exclude any food groups specifically, but rather focuses on reducing intake from high load-carbohydrate foods in general; and when carbohydrate is eaten, whole-food sources are preferred to processed ones. In contrast, vegetarian and vegan diets are styles of eating that do exclude several food groups that contain vital micronutrients. Recently a lacto-ovo vegetarian diet has been shown to be nutrient-replete, if well-planned using an array of non-animal sources containing these potentially missing nutrients<sup>16</sup>. However, a traditional vegan diet is deficient in Vitamin B12,

1  
2  
3 as this vitamin is derived only from foods of animal origin; it is also low in the fat-soluble  
4  
5 Vitamins A and D, with consumption of fortified foods and supplementation necessary for  
6  
7 their repletion <sup>17 18</sup>. Despite the known nutrient deficiency risks that arise with vegan and  
8  
9 some vegetarian eating styles, national and international nutrition organisations are not  
10  
11 dissuasive of these diets; nutrition professionals merely address any dietary issues in clinical  
12  
13 practice <sup>19 20</sup>. By contrast, carbohydrate-restricted diets are still frowned upon by many  
14  
15 dietitians and associated national organisations <sup>10</sup>, despite their endorsement by some  
16  
17 organisations such as The Commonwealth Scientific and Industrial Research Organisation  
18  
19 (CSIRO) <sup>21</sup>. This study aimed to assess the micronutrient thresholds of two versions of the  
20  
21 LCHF diet against national NRV thresholds, as set by the Australian National Health and  
22  
23 Medical Research Council (NHMRC) and New Zealand Ministry of Health (MOH) <sup>11</sup> under  
24  
25 two conditions of saturated fat thresholds.  
26  
27  
28

## 29 **Methods**

30  
31  
32 In this descriptive study, we designed two LCHF meal plans for each of two hypothetical  
33  
34 case studies representing the average Australian male and female as closely as possible.  
35  
36 Using the BMI equation  $BMI = (\text{weight-kg}) / (\text{height-m} \times \text{height-m})$ , we inputted national  
37  
38 average heights recorded by the Australian Bureau of Statistics 2011-2013 for male and  
39  
40 female adults <sup>22</sup> and used the midpoint for a healthy range BMI of 22.5 to calculate body  
41  
42 weight. To estimate total energy expenditure, we used the Schofield equation <sup>23</sup>, where  
43  
44 weight and height variables and an activity factor of 1.6 (light level) were inputted. The adult  
45  
46 age range category of 19-50 years was selected from the Australian NHMRC and New  
47  
48 Zealand MOH set of categories <sup>11</sup>. We used computer analysis software FoodWorks  
49  
50 Professional, version 8 (Xyris software), which utilises an Australian and New Zealand food  
51  
52 database. The only NRV that varies within this age category is magnesium, which is slightly  
53  
54 higher, for both males and females, in the 35-50 years age sub-category, than in the 19-35  
55  
56  
57  
58  
59  
60

1  
2  
3 year age sub-category; this was accounted for in the analysis. Total energy intake would  
4 likely change within the age groups and was accounted for in the analysis by ensuring that  
5 energy intake was met within 95% of requirements for both a 25-year old and a 45-year old  
6 male and female. We assumed weight stability and matched the energy intake with the  
7 calculated energy expenditure.  
8  
9  
10  
11  
12

13  
14 For the macronutrient thresholds, we selected a value of carbohydrate that aligned with the  
15 'low carbohydrate' definition as per Feinman and colleagues<sup>24</sup> i.e., <130g per day (or <26%  
16 of total energy). The protein threshold was calculated based on the upper limit of the  
17 acceptable macronutrient distribution range (AMDR) as per the Australian NHMRC and New  
18 Zealand MOH guidelines (i.e., 25% of total energy intake)<sup>11</sup>. Fat was set as the remaining  
19 calories. The two sample meal plans differed only by saturated fat content, which was set at  
20 the threshold of 10% or less of total energy intake. All micronutrients were required to  
21 achieve at least 100% of the NRVs. The NRVs are a set of recommendations for nutritional  
22 intake based on currently available scientific knowledge. NRVs include Recommended  
23 Dietary Intakes (RDIs), a term used to represent the average daily micronutrient level  
24 sufficient to meet the requirements of almost all (97–98%) healthy individuals of a certain  
25 gender and life stage, and Adequate Intakes (AIs), where the nutrient intake level is based on  
26 observed or experimentally-determined nutrient estimates of apparently healthy people and  
27 are assumed to be adequate<sup>11</sup>. Where the RDI value was not available, the AI value was  
28 used. Table 1 presents the demographic data used for the case studies.  
29  
30  
31  
32  
33  
34  
35  
36  
37  
38  
39  
40  
41  
42  
43  
44  
45

46  
47 Insert Table 1 here.  
48  
49

50 We created two different meal plans for the purpose of ensuring variety in food options, using  
51 the same macronutrient and micronutrient thresholds and targets for both sets of plans. For  
52 each sample meal plan, the male and female versions differ only by portion sizes to align  
53  
54  
55  
56  
57  
58  
59  
60

1  
2  
3 with personalised energy requirements. For the dual purpose of preventing duplication in  
4  
5 Table 2 and wanting to illustrate dietary variety, we have elected to present meal plan sample  
6  
7 1 for females and meal plan sample 2 for males, along with their corresponding diets with  
8  
9 saturated fat limits. All meals have been developed with a whole-food principle (i.e., using  
10  
11 foods that have been minimally processed) as a foundation. We also opted to include foods  
12  
13 that we considered to be, generally, popular and acceptable, rather than any specialty or  
14  
15 unusual food that would demand an acquired taste.  
16

## 17 18 **Results**

19  
20  
21 Tables 2 and 3 present the LCHF sample meal plans for females and males, and the nutrient  
22  
23 analysis of the meal plans, respectively, with their corresponding plans aligning with the  
24  
25 saturated fat threshold of <10% total energy.  
26

27  
28 Insert Table 2 here.  
29

30  
31 Insert Table 3 here.  
32

33  
34 Both of the meal plans successfully exceeded the NRV thresholds for all nutrients, apart from  
35  
36 two instances. The first was iron intake in females, the two meal plans achieving 86-98% of  
37  
38 the RDI threshold value for this mineral. The second instance was an inability to meet the  
39  
40 <10% of total energy intake saturated fat threshold in the male (meal plan 2 only). In this  
41  
42 plan, saturated fat amounted to 10.6% of total energy, exceeding the threshold by 0.6% (or  
43  
44 2g).  
45

## 46 47 **Discussion**

48  
49  
50 Overall, the LCHF meal plans successfully achieved almost all of the NRV thresholds. There  
51  
52 are several important points about iron that warrant discussion. Firstly, in our meal plan  
53  
54 development, we specifically selected whole, unprocessed foods that were not fortified with  
55  
56  
57  
58  
59  
60

1  
2  
3 nutrients, such as iron. We also decided to purposely exclude liver and mussels from these  
4 plans, despite their rich nutrient density, as we are aware that these foods may not be  
5 considered appealing for the majority of the population. However, it is worthwhile noting that  
6 the addition of a small amount of chicken liver (i.e., 5g and 25g, or 1-4 mussels, in meal  
7 plans 1 and 2, respectively), would have resulted in the RDI being met for iron. Our strategy  
8 differs somewhat to the work of Reid et al., who, knowing iron is a nutrient of concern for  
9 vegetarians, intentionally incorporated iron-fortified foods in their vegetarian meal plans.  
10 Hence, they were able to meet iron requirements, apart from during pregnancy, where the  
11 RDI is higher<sup>16</sup>.

12  
13 Secondly, iron bioavailability is affected by dietary composition and iron status, two aspects  
14 that are not considered comprehensively in RDI threshold generation. For industrialised  
15 countries, like Australia and New Zealand a mean iron bioavailability factor is used to  
16 generate the iron RDI for all population groups, irrespective of dietary composition<sup>25</sup>. Iron  
17 bioavailability is reduced by phytates, found predominantly in wholegrains, such as breads  
18 and cereals<sup>25</sup>. Other compounds that reduce bioavailability are polyphenols and oxalates, and  
19 while found in vegetables and fruit, are also present in wholegrains. The LCHF diet is  
20 typically very low (or devoid) in grains, which could mean higher iron bioavailability for  
21 those consuming such a diet. This, along with other factors that influence nutrient status, plus  
22 the natural variation in food intake raises caution about the use of the RDI threshold alone to  
23 assess an individual's diet at a glimpse. While not presented in this work, our nutrient  
24 analysis work on isocaloric diets aligning with the Australian NHMRC and New Zealand  
25 MOH guidelines, also indicate a failure to meet the RDI threshold for iron. As such, while the  
26 LCHF diet is often targeted for being inadequate, using NRVs as a dietary adequacy tool, one  
27 can assume a similar inadequacy for iron under mainstream dietary guidance using  
28 unfortified foods, where possible. It is worthwhile to note that this point can also be applied

1  
2  
3 to other micronutrients, in that it is unlikely that any diet will achieved over 100% of the  
4 NRV thresholds each day; hence the reason why dietitians encourage the consumption of a  
5 varied diet.  
6  
7

8  
9  
10 In the instance where the saturated fat threshold of <10% of total energy was not met in one  
11 of the male meal plans, comprehensive dietary manipulation of this meal plan for the specific  
12 purpose of meeting this target was attempted. In order to achieve carbohydrate and protein  
13 targets, the only way to achieve the energy requirements with a <10% saturated fat threshold  
14 was to add an alcoholic beverage into the meal plan, as it is the only food item that provides  
15 energy without any other macronutrient. We viewed this as being somewhat futile so decided  
16 against this option. It is also important to note that during this dietary manipulation exercise,  
17 in order to reduce the saturated fat contribution, once all the relevant animal foods were  
18 altered to low-fat or non-fat versions (i.e., dairy products and meats) and coconut products  
19 were removed, the saturated fat content still slightly exceeded the 10% threshold, by 0.6%. It  
20 was only when we reduced the amount of avocados, certain seeds, olive oil and macadamia  
21 nuts, i.e., foods that contain predominantly unsaturated fats, did the thresholds align. In New  
22 Zealand and Australia, saturated fat guidelines exist in the form of a percentage of total  
23 energy threshold, and it is not known whether the public health caution for saturated fat  
24 relates to an absolute amount consumed in grams or is relative to total energy only,  
25 suggesting that as a guideline it is rather arbitrary.  
26  
27  
28  
29  
30  
31  
32  
33  
34  
35  
36  
37  
38  
39  
40  
41  
42  
43  
44

45 There are three other nutrient components that warrant discussion in the context of LCHF  
46 diets: B vitamins and fibre, protein and essential fatty acids.  
47  
48

#### 49 *B vitamins and fibre*

50

51  
52 The LCHF diet is frequently criticised for being deficient in B vitamins in particular Vitamin  
53 B1, or thiamin, and fibre, two key components of grain-based foods. We have demonstrated  
54  
55  
56  
57  
58  
59  
60



1  
2  
3 that these meal plans do indeed meet the RDI threshold for thiamin due to the incorporation  
4 of alternative, every day thiamin-rich foods such as animal protein, nuts and seeds, and  
5 several green vegetables. Despite RDIs met for thiamin, one could call into question the  
6 minimum threshold of thiamin required in an LCHF context. A key function of thiamin is the  
7 metabolism of carbohydrate<sup>26</sup>; it could be speculated that with a reduced intake of  
8 carbohydrate, less thiamin is required. However, considering that in the absence of  
9 exogenous carbohydrate, glucose is still made internally through gluconeogenic precursors,  
10 research is warranted to determine whether this theory holds any truth. We also demonstrate  
11 that the AIs for fibre are surpassed in all of these meal plans, and while devoid of  
12 wholegrains, fibre, both soluble and insoluble, can be easily derived from vegetables, some  
13 fruit, nuts and seeds.  
14  
15  
16  
17  
18  
19  
20  
21  
22  
23  
24  
25

### 26 27 *Protein*

28  
29  
30 Another misconception about the LCHF diet is that it is excessive in protein. We used the  
31 protein AMDR as per the Australian NHMRC and New Zealand MOH in the development of  
32 these meal plans; however, the female meal plan 1 (<10% saturated fat threshold) exceeded  
33 the maximum AMDR protein threshold by 2% (or 7g of protein). In the dietary manipulation  
34 required to reduce saturated fat (i.e., a swap from untrimmed Sirloin steak to lean Eye fillet  
35 steak for dinner, and a swap from full-fat to non-fat dairy products) what resulted was a  
36 higher proportion of protein being derived from those foods at the same quantities so it was  
37 unavoidable. While the LCHF diet is not intended to be any higher in protein than current  
38 dietary recommendations, in this case protein only exceeded the AMDR when saturated fat  
39 was restricted. .  
40  
41  
42  
43  
44  
45  
46  
47  
48  
49  
50

### 51 52 *Omega-6: omega-3 Polyunsaturated Fat (PUFA) ratio*

1  
2  
3 A key characteristic of the LCHF way of eating is the discouragement of consumption of  
4 seed oils (eg. Canola, Sunflower, Soybean, Corn oil and Rice Bran oil), in order to minimise  
5 intake of linoleic acid (omega-6 PUFA), and consequently, to achieve an optimal omega 6:3  
6 ratio. Evidence suggests that a high ratio is pro-inflammatory and has a role to play in  
7 promoting the pathogenesis of chronic diseases such as cardiovascular disease, cancer,  
8 inflammatory and autoimmune diseases <sup>27 28</sup>. Furthermore, data indicates that humans  
9 evolved on a diet with a 1:1 omega 6:3 ratio, whereas Western dietary patterns typically  
10 reflect a ratio of around 15-20:1 <sup>28</sup>. Along with the promotion of olive oil use, which is  
11 unanimously endorsed, NHMRC / MOH guidelines recommend the use and consumption of  
12 vegetable fats (i.e., margarine, Canola, Sunflower, Soybean, Corn oil and Rice Bran oil) in  
13 place of fats with a predominantly saturated fat make-up (i.e., butter, coconut oil). As a result,  
14 most packaged supermarket foods including foods recommended by the NHMRC / MOH,  
15 such as liquid breakfasts, wholegrain bread, and cereals contain omega-6-rich seed oils. This  
16 would not necessarily be problematic if omega-3 intakes were increasing on a population  
17 level. However, this is not the case; it was recently reported in the Australian 2011–2012  
18 National Nutrition and Physical Activity Survey that 80% of the population was not meeting  
19 the NRV threshold for omega-3 <sup>29</sup>. In our sample meal plans, we demonstrate favourable  
20 omega-6: omega-3 ratios, i.e., less than the 10:1 NRV thresholds, and substantially closer to  
21 that of our dietary composition prior to the agricultural revolution.  
22  
23  
24  
25  
26  
27  
28  
29  
30  
31  
32  
33  
34  
35  
36  
37  
38  
39  
40  
41  
42  
43

44 Finally, it is important to note that LCHF eating is frequently adopted for weight loss  
45 purposes. In this context it would be highly likely that energy intakes would be lower than  
46 that of these hypothetical healthy weight case studies for a certain period of time, while  
47 weight is being lost. This poses a risk to achieving 100% of all NRVs on a daily basis;  
48 however, this would not be unique to the LCHF approach, but would apply to any energy-  
49 restricted eating style, including mainstream national nutrition guidelines. During the active  
50  
51  
52  
53  
54  
55  
56  
57  
58  
59  
60

1  
2  
3 weight loss period, nutrient density should be a priority and if suboptimal nutrient status  
4 becomes a concern, this could be addressed by the inclusion of nutrient-fortified foods or  
5 supplementation.  
6  
7  
8  
9

## 10 **Conclusion**

11  
12 There were two key limitations to this work. Firstly, the average height for Australian males  
13 and females, respectively, and the midpoint BMI values were used to extrapolate the weights  
14 of the two hypothetical case studies. These weights do not align with documented weights for  
15 Australian males (85.9kg) and females (71.1kg), respectively <sup>22</sup>. This underestimation of  
16 weight would have underestimated energy intake to a small extent. Secondly, our analyses  
17 were limited to the available values in the FoodWorks database; consequently, an accurate  
18 estimate of Vitamin D intake was not available. It is reported that due to current eating  
19 patterns, it is almost impossible to get sufficient Vitamin D (in this case 5µg/day) from the  
20 diet alone <sup>30</sup> and it is the assumption that it will be derived from sun exposure. It is likely that  
21 the LCHF diet supplies more Vitamin D than mainstream nutrition guidelines due to its  
22 greater intake of high fat, Vitamin D-rich foods, such as full-fat dairy, butter, eggs and fatty  
23 fish.  
24  
25  
26  
27  
28  
29  
30  
31  
32  
33  
34  
35  
36  
37  
38

39 We have demonstrated that a well-formulated LCHF diet can provide sufficient intakes of all  
40 of the micronutrients profiled in the FoodWorks database, apart from iron for females. This  
41 marginal shortfall along with the acknowledged limitations of using NRVs in estimating  
42 dietary adequacy, leads us to believe that this is not a nutrient of concern for those consuming  
43 the LCHF diet. Irrespective of the ongoing saturated fat / heart disease scientific debate, it is  
44 still possible to adopt the LCHF diet while keeping saturated fat intake around the 10% of  
45 total energy threshold. Considering this way of eating provides a replete set of nutrients, and  
46 has been shown to be effective for improving metabolic health, particularly for people with  
47  
48  
49  
50  
51  
52  
53  
54  
55  
56  
57  
58  
59  
60

1  
2  
3 diabetes, it should at least be considered a suitable dietary option for populations, alongside  
4  
5 that of mainstream MOH guidelines.  
6  
7  
8  
9

### 10 **Contributorship statement**

11  
12  
13 C. Zinn, A. Rush and R. Johnson contributed to the conception and design of the research; C.  
14  
15 Zinn, A. Rush contributed to the diet development and analysis. C. Zinn, A. Rush and R.  
16  
17 Johnson contributed to the interpretation of the data; C. Zinn drafted the manuscript. C. Zinn,  
18  
19 A. Rush and R. Johnson read and approved the final manuscript.  
20  
21

### 22 **Competing interests**

23  
24  
25 All authors have completed the ICMJE uniform disclosure form at  
26  
27 [www.icmje.org/coi\\_disclosure.pdf](http://www.icmje.org/coi_disclosure.pdf) and declare: no support from any organisation for the  
28  
29 submitted work; no financial relationships with any organisations that might have an interest  
30  
31 in the submitted work in the previous three years; CZ has co-authored two books called  
32  
33 “What The Fat? - Fat’s in, Sugar’s out”, and “What The Fat – Sports performance” which  
34  
35 both assume an LCHF nutrition approach.  
36  
37  
38

### 39 **Funding**

40  
41  
42 This research received no specific grant from any funding agency in the public, commercial  
43  
44 or not-for-profit sectors.  
45  
46

### 47 **Data sharing statement**

48  
49  
50 Data (nutrient analysis) is unable to be placed on a data sharing system due to it being  
51  
52 embedded in specific nutrient analysis software that is unable to be shared outside of the  
53  
54 software programme. However, a print screen version of the data is available upon request  
55  
56 from the author.  
57  
58  
59  
60

## References

1. Unwin D, Unwin J. Low carbohydrate diet to achieve weight loss and improve HbA1c in type 2 diabetes and pre-diabetes: experience from one general practice. *Practical Diabetes* 2014;31(2):76-79. doi: 10.1002/pdi.1835
2. Noakes TD. Low-carbohydrate and high-fat intake can manage obesity and associated conditions: Occasional survey. *S. Afr. Med. J.* 2013;103(11):826-30. doi: 10.7196/SAMJ.7302
3. McKenzie A, Hallberg SJ, Creighton BC, et al. A Novel Intervention Including Individualized Nutritional Recommendations Reduces Hemoglobin A1c Level, Medication Use, and Weight in Type 2 Diabetes. *JMIR Diabetes* 2017;2(1):e5. doi: 10.2196/diabetes.6981
4. Fan Y, Di H, Chen G, et al. Effects of low carbohydrate diets in individuals with type 2 diabetes: systematic review and meta-analysis. *Int. J. Clin. Exp. Med.* 2016;9(6):11166-74.
5. Forsythe CE, Phinney SD, Fernandez ML, et al. Comparison of low fat and low carbohydrate diets on circulating fatty acid composition and markers of inflammation. *Lipids* 2008;43(1):65-77. doi: 10.1007/s11745-007-3132-7
6. Sackner-Bernstein J, Kanter D, Kaul S. Dietary Intervention for Overweight and Obese Adults: Comparison of Low-Carbohydrate and Low-Fat Diets. A Meta-Analysis. *PLoS One* 2015;10(10):e0139817. doi: 10.1371/journal.pone.0139817
7. Foster GD, Wyatt HR, Hill JO, et al. Weight and metabolic outcomes after 2 years on a low-carbohydrate versus low-fat diet: a randomized trial. *Ann. Intern. Med.* 2010;153(3):147-57. doi: 10.7326/0003-4819-153-3-201008030-00005

- 1  
2  
3 8. Shai I, Schwarzfuchs D, Henkin Y, et al. Weight loss with a low-carbohydrate,  
4  
5 Mediterranean, or low-fat diet. *N. Engl. J. Med.* 2008;359(3):229-41. doi:  
6  
7 10.1056/NEJMoa0708681  
8
- 9 9. Diabetes UK. Is it time to stop promoting carbohydrates to people with diabetes?  
10  
11 2017 [cited 2017 8 March]. Available from:  
12  
13 [https://www.diabetes.org.uk/About\\_us/News/Carbohydrates-and-diabetes-debate/](https://www.diabetes.org.uk/About_us/News/Carbohydrates-and-diabetes-debate/)  
14  
15 accessed 15 September 2015.  
16  
17
- 18 10. Nursing Review. Fad diets: what do dietitians say about the latest crop? 2015  
19  
20 [Available from: [http://www.nursingreview.co.nz/issue/june-2015-vol-15-3/fad-diets-](http://www.nursingreview.co.nz/issue/june-2015-vol-15-3/fad-diets-what-do-dietitians-say-about-the-latest-crop/#.WL8yITXJKnk)  
21  
22 [what-do-dietitians-say-about-the-latest-crop/#.WL8yITXJKnk](http://www.nursingreview.co.nz/issue/june-2015-vol-15-3/fad-diets-what-do-dietitians-say-about-the-latest-crop/#.WL8yITXJKnk) accessed 5 June 2015.  
23  
24
- 25 11. National Health and Medical Research Council, Ministry of Health. Nutrient  
26  
27 reference values for Australia and New Zealand Including Recommended Dietary  
28  
29 Intakes., 2005.  
30
- 31 12. Harcombe Z, Baker JS, Davies B. Evidence from prospective cohort studies does not  
32  
33 support current dietary fat guidelines: a systematic review and meta-analysis. *British*  
34  
35 *J. Sports Med.* 2016;0:1-8. doi: 10.1136/bjsports-2016-096550  
36  
37
- 38 13. Harcombe Z, Baker JS, DiNicolantonio JJ, et al. Evidence from randomised  
39  
40 controlled trials does not support current dietary fat guidelines: a systematic review  
41  
42 and meta-analysis. *Open Heart* 2016;3(2):e000409. doi: 10.1136/openhrt-2016-  
43  
44 000409  
45
- 46 14. Ramsden CE, Zamora D, Majchrzak-Hong S, et al. Re-evaluation of the traditional  
47  
48 diet-heart hypothesis: analysis of recovered data from Minnesota Coronary  
49  
50 Experiment (1968-73). *BMJ* 2016;353:i1246. doi: 10.1136/bmj.i1246  
51  
52  
53  
54  
55  
56  
57  
58  
59  
60

- 1  
2  
3 15. Siri-Tarino PW, Chiu S, Bergeron N, et al. Saturated Fats Versus Polyunsaturated  
4  
5 Fats Versus Carbohydrates for Cardiovascular Disease Prevention and Treatment.  
6  
7 *Annu. Rev. Nutr.* 2015;35:517-43. doi: 10.1146/annurev-nutr-071714-034449  
8
- 9  
10 16. Reid MA, Marsh KA, Zeuschner CL, et al. Meeting the nutrient reference values on a  
11  
12 vegetarian diet. *Med. J. Aust.* 2013;199(4 Suppl):S33-40.
- 13  
14 17. Pawlak R, Lester SE, Babatunde T. The prevalence of cobalamin deficiency among  
15  
16 vegetarians assessed by serum vitamin B12: a review of literature. *Eur. J. Clin. Nutr.*  
17  
18 2014;68(5):541-8. doi: 10.1038/ejcn.2014.46  
19
- 20  
21 18. Craig WJ. Nutrition concerns and health effects of vegetarian diets. *Nutr. Clin. Pract.*  
22  
23 2010;25(6):613-20. doi: 10.1177/0884533610385707
- 24  
25 19. American Dietetic Association, Dietitians of Canada. Position of the American  
26  
27 Dietetic Association and Dietitians of Canada: Vegetarian diets. *J. Am. Diet. Assoc.*  
28  
29 2003;103(6):748-65. doi: 10.1053/jada.2003.50142  
30
- 31  
32 20. Webb D. Defending Vegan Diets — RDs Aim to Clear Up Common Misconceptions  
33  
34 About Vegan Diets. *Today's Dietitian*. Spring City, PA: Great Valley Publishing  
35  
36 Company, Inc., 2010:20.
- 37  
38 21. CSIRO. CSIRO Low Carb Diet Book 2017 [cited 2017 18 April]. Available from:  
39  
40 <https://www.csiro.au/en/Research/Health/CSIRO-diets/CSIRO-Low-Carb-Diet-Book>  
41  
42 accessed 18 April 2017.
- 43  
44 22. Australian Bureau of Statistics. Profiles of Health, Australia, 2011-13 2013 [cited  
45  
46 2017 3 February]. Available from:  
47  
48 <http://www.abs.gov.au/ausstats/abs@.nsf/Lookup/4338.0main+features212011-13>  
49  
50 accessed 3 February 2017.
- 51  
52 23. Schofield WN. Predicting basal metabolic rate, new standards and review of previous  
53  
54 work. *Hum. Nutr. Clin. Nutr.* 1985;39 Suppl 1:5-41.  
55  
56  
57  
58  
59  
60

- 1  
2  
3 24. Feinman RD, Pogozelski WK, Astrup A, et al. Dietary carbohydrate restriction as the  
4 first approach in diabetes management: critical review and evidence base. *Nutrition*  
5 2015;31(1):1-13. doi: 10.1016/j.nut.2014.06.011  
6  
7  
8  
9 25. Hurrell R, Egli I. Iron bioavailability and dietary reference values. *Am. J. Clin. Nutr.*  
10 2010;91(5):1461S-67S. doi: 10.3945/ajcn.2010.28674F  
11  
12  
13 26. Manzetti S, Zhang J, van der Spoel D. Thiamin function, metabolism, uptake, and  
14 transport. *Biochemistry* 2014;53(5):821-35. doi: 10.1021/bi401618y  
15  
16  
17 27. Kang JX. The omega-6/omega-3 fatty acid ratio in chronic diseases: animal models  
18 and molecular aspects. *World Rev. Nutr. Diet.* 2011;102:22-9. doi:  
19 10.1159/000327787  
20  
21  
22  
23 28. Simopoulos AP. The importance of the omega-6/omega-3 fatty acid ratio in  
24 cardiovascular disease and other chronic diseases. *Exp. Biol. Med. (Maywood)*  
25 2008;233(6):674-88. doi: 10.3181/0711-MR-311  
26  
27  
28  
29 29. Meyer BJ. Australians are not Meeting the Recommended Intakes for Omega-3 Long  
30 Chain Polyunsaturated Fatty Acids: Results of an Analysis from the 2011-2012  
31 National Nutrition and Physical Activity Survey. *Nutrients* 2016;8(3):111. doi:  
32 10.3390/nu8030111  
33  
34  
35  
36  
37  
38  
39 30. Fuller KE, Casparian JM. Vitamin D: balancing cutaneous and systemic  
40 considerations. *South Med. J.* 2001;94(1):58-64.  
41  
42  
43  
44  
45  
46  
47  
48  
49  
50  
51  
52  
53  
54  
55  
56  
57  
58  
59  
60



## Tables

**Table 1: Case study demographics.**

|                | Age range (years) | Reference Height (cm) | Reference Weight (kg) | PAL | Energy (kCal) | CHO (g) | Protein UL 25% E (g) | Saturated Fat 10% E (g) |
|----------------|-------------------|-----------------------|-----------------------|-----|---------------|---------|----------------------|-------------------------|
| <b>Male</b>    | 19-50             | 175                   | 63-71                 | 1.6 | 2820          | 65      | 165.4                | 30.5                    |
| <b>Females</b> | 19-50             | 162                   | 56.3                  | 1.6 | 2203          | 65      | 129.4                | 23.8                    |

Table 2: LCHF sample meal plans.

| LCHF meal plan 1 (females)                                                                                                                                                                    | LCHF meal plan 1 (females) (saturated fat <10% of total energy)                                                                                                                                              | LCHF meal plan 2 (males)                                                                                                                                                               | LCHF meal plan 2 (males) (saturated fat <10% of total energy)                                                                                                                                                                                          |
|-----------------------------------------------------------------------------------------------------------------------------------------------------------------------------------------------|--------------------------------------------------------------------------------------------------------------------------------------------------------------------------------------------------------------|----------------------------------------------------------------------------------------------------------------------------------------------------------------------------------------|--------------------------------------------------------------------------------------------------------------------------------------------------------------------------------------------------------------------------------------------------------|
| <i>Breakfast</i>                                                                                                                                                                              | <i>Breakfast</i>                                                                                                                                                                                             | <i>Breakfast</i>                                                                                                                                                                       | <i>Breakfast</i>                                                                                                                                                                                                                                       |
| ¼ cup frozen mixed berries, 150g plain, unsweetened, full-fat yoghurt, 2 T <sup>†</sup> each sunflower and pumpkin seeds, 3 macadamia nuts, 2 Brazil nuts, 6 almonds                          | ¼ cup frozen mixed berries, 150g plain, <i>unsweetened low-fat yoghurt</i> , 2 T each sunflower and pumpkin seeds, 3 macadamia nuts, 2 Brazil nuts, 6 almonds                                                | Omelette: 3 eggs, 60g mushrooms, 100g tomato, 1 cup baby spinach, cooked in 2 tsp butter.<br>Coffee made with 200ml full-fat milk                                                      | Omelette: 3 eggs, 60g mushrooms, 100g tomato, 1 cup baby spinach, cooked in 3 tsp <i>olive oil</i><br>Coffee made with 200ml <i>low-fat milk</i>                                                                                                       |
| <i>Lunch</i>                                                                                                                                                                                  | <i>Lunch</i>                                                                                                                                                                                                 | <i>Lunch</i>                                                                                                                                                                           | <i>Lunch</i>                                                                                                                                                                                                                                           |
| Tuna salad: 95g tin tuna, canned in brine (drained), 1 cup baby spinach leaves, 60g English cucumber, 5 cherry tomatoes, 30g cheddar cheese, 2T linseeds, 1 tsp* basil pesto, 3 tsp olive oil | Tuna salad: 95g tin tuna, canned in brine (drained), 1 cup baby spinach leaves, 60g English cucumber, 5 cherry tomatoes, 30g <i>low fat cottage cheese</i> , 2T linseeds, 10 green olives, 5 tsp avocado oil | Beef salad: 120g Eye fillet, 1 cup spinach leaves, ½ red capsicum, 60g English cucumber, 5 cherry tomatoes, ½ large avocado, 5 walnuts, 1T linseeds, 30g parmesan cheese, 2T olive oil | Beef salad: 150g Eye fillet, 1 cup spinach leaves, ½ red capsicum, 60g English cucumber, 5 cherry tomatoes, ½ large avocado, 3 T <i>sunflower seeds</i> , 12 green olives, 30g <i>low fat cottage cheese</i> , 2T <i>olive oil</i> , 2 tsp avocado oil |
| <i>Dinner</i>                                                                                                                                                                                 | <i>Dinner</i>                                                                                                                                                                                                | <i>Dinner</i>                                                                                                                                                                          | <i>Dinner</i>                                                                                                                                                                                                                                          |
| 150g Sirloin steak, fat not trimmed, grilled, roasted vegetables: 8 florets cauliflower, 1 medium sized beetroot, 1 medium courgette, 1 medium carrot, coated in 2T olive oil                 | 150g <i>Beef eye fillet</i> , <i>grilled</i> , roasted vegetables: 8 florets cauliflower, 1 medium sized beetroot, 1 medium courgette, 1 medium carrot, coated in 2T olive oil                               | 130g grilled Salmon, 100g green beans, 150g broccoli, 200g grilled pumpkin, ½ cup peas, 1 T olive oil                                                                                  | 150g grilled Salmon, 100g green beans, 150g broccoli, 200g grilled pumpkin, ½ cup peas, 1 T olive oil                                                                                                                                                  |
| <i>Snacks</i>                                                                                                                                                                                 | <i>Snacks</i>                                                                                                                                                                                                | <i>Snacks</i>                                                                                                                                                                          | <i>Snacks</i>                                                                                                                                                                                                                                          |
| 10 medium strawberries<br>3T pistachio nuts                                                                                                                                                   | 10 medium strawberries<br>3T pistachio nuts                                                                                                                                                                  | 20 macadamia nuts<br>Smoothie made with 200ml                                                                                                                                          | 20 macadamia nuts<br>Smoothie made with 200ml                                                                                                                                                                                                          |

|                                      |                                                                                |                                                                                |                                                                                                                        |
|--------------------------------------|--------------------------------------------------------------------------------|--------------------------------------------------------------------------------|------------------------------------------------------------------------------------------------------------------------|
| Coffee made with 200ml full fat milk | 100g low fat plain, unsweetened yoghurt<br>Coffee made with 200ml low-fat milk | full fat milk, 10 medium strawberries, crushed nuts (20g almonds, 2T linseeds) | low-fat milk, 10 medium strawberries, crushed nuts (20g almonds, 2T linseeds, 100g low fat plain, unsweetened yoghurt) |
|--------------------------------------|--------------------------------------------------------------------------------|--------------------------------------------------------------------------------|------------------------------------------------------------------------------------------------------------------------|

† T = tablespoon; \* tsp = teaspoon

Table 3: Nutrient analysis of LCHF meal plans.

| Nutrient                              | Female meal plans |                                                   |                  | Male meal plans |                                                   |                  |
|---------------------------------------|-------------------|---------------------------------------------------|------------------|-----------------|---------------------------------------------------|------------------|
|                                       | Meal plan 1       | Meal plan 1 (saturated fat <10% TE)<br>NRV / goal | NRV / goal       | Meal plan 2     | Meal plan 2 (saturated fat <10% TE)<br>NRV / goal | NRV / goal       |
| <b>Energy (Cal)</b>                   | 2145              | 2053                                              | 2203             | 2675            | 2758                                              | 2820             |
| <b>Carbohydrate (g)</b>               | 61                | 67                                                | 248-358          | 66              | 69                                                | 303-439          |
| % TE <sup>†</sup>                     | 11                | 13                                                | 45-65            | 10              | 10                                                | 45-65            |
| <b>Protein (g)</b>                    | 115               | 135                                               | 83-138           | 149             | 164                                               | 106-176          |
| % TE                                  | 22                | 26                                                | 15-25            | 22              | 24                                                | 15-25            |
| <b>Fat (g)</b>                        | 153               | 129                                               | 49-86            | 194             | 195                                               | 63-110           |
| % TE                                  | 63                | 57                                                | 20-35            | 65              | 64                                                | 20-35            |
| <b>Saturated fat (g)</b>              | 40                | 21                                                | 24               | 46              | 33                                                | 31               |
| % TE                                  | 28                | 9.6                                               | 10               | 15              | 10.6                                              | 10               |
| <b>Trans fats (g)</b>                 | 2.2               | 0.7                                               | <2.4             | 1.4             | 0.8                                               | <3g              |
| % TE                                  | 0.9               | 0.3                                               | <1% <sup>‡</sup> | 0.4             | 0.3                                               | <1% <sup>‡</sup> |
| <b>Monounsaturated fat (MUFA) (g)</b> | 75                | 71                                                | -                | 101             | 117                                               | -                |
| % total fat                           | 53                | 59                                                | -                | 56              | 65                                                | -                |
| <b>Polyunsaturated fat (PUFA) (g)</b> | 27                | 28                                                | -                | 32              | 31                                                | -                |
| % total fat                           | 19                | 23                                                | -                | 18              | 17                                                | -                |
| <b>Linoleic acid (O6 PUFA) (g)</b>    | 20.4              | 18.6                                              | 8*               | 19.1            | 18.5                                              | 13*              |
| <b>α-linoleic acid (O3 PUFA) (g)</b>  | 5.8               | 5.5                                               | 0.8*             | 9.3             | 6.2                                               | 1.3*             |
| <b>Omega 6: omega 3 ratio</b>         | 3.5               | 3.4                                               | 10               | 2.1             | 3.0                                               | 10               |
| <b>Fibre (g)</b>                      | 38                | 39                                                | 25*              | 45              | 44                                                | 30*              |
| <b>Thiamin (mg)</b>                   | 1.4               | 1.4                                               | 1.1              | 1.6             | 1.8                                               | 1.2              |
| <b>Riboflavin (mg)</b>                | 2.4               | 2.4                                               | 1.1              | 3.3             | 3.5                                               | 1.3              |
| <b>Niacin (mg)</b>                    | 23.4              | 18.8                                              | 14               | 16.2            | 17.5                                              | 16               |
| <b>Vitamin C (mg)</b>                 | 371               | 370                                               | 45               | 394             | 398                                               | 45               |
| <b>Vitamin A (µg)</b>                 | 2247              | 2095                                              | 700              | 2374            | 2047                                              | 900              |
| <b>Vitamin E (mg)</b>                 | 23                | 22                                                | 7*               | 32              | 41                                                | 10*              |
| <b>Vitamin B12 (µg)</b>               | 3.9               | 6.4                                               | 2.4              | 11.6            | 12.8                                              | 2.4              |

|                           |      |      |         |      |      |         |
|---------------------------|------|------|---------|------|------|---------|
| <b>Folate, total (µg)</b> | 568  | 583  | 400     | 788  | 757  | 400     |
| <b>Calcium (mg)</b>       | 1093 | 1224 | 1000    | 1216 | 1251 | 1000    |
| <b>Iron (mg)</b>          | 16   | 16   | 18      | 20   | 21   | 8       |
| <b>Magnesium (mg)</b>     | 553  | 589  | 310-320 | 582  | 598  | 400-420 |
| <b>Zinc (mg)</b>          | 16   | 22   | 8       | 23   | 24   | 14      |
| <b>Sodium (mg)</b>        | 2183 | 2250 | 460*    | 1554 | 2032 | 460*    |
| <b>Potassium (mg)</b>     | 4639 | 5154 | 2800*   | 5585 | 6107 | 3800*   |
| <b>Phosphorous (mg)</b>   | 1848 | 2076 | 1000    | 2478 | 2644 | 1000    |
| <b>Selenium (µg)</b>      | 166  | 169  | 60      | 113  | 117  | 70      |
| <b>Iodine (µg)</b>        | 225  | 190  | 150     | 223  | 207  | 150     |

† TE: Total energy

\*AIs were used as RDIs were unavailable

‡ World Health Organisation recommendation for trans fats
